# Supplementary material for: The assembly of vanadium(iv)-substituted Keggin-type polyoxometalate/graphene nanocomposite and its application in photovoltaic system
Source: Royal Society of Chemistry journal article supplement (doi:10.1039/c5ta01578b), 2015-01-01
Supplement: c5ta01578b1.pdf [file c5ta01578b1.pdf]

## Supporting information

### The Assembly of Vanadium (IV)-Substituted Keggin-type Polyoxometalate/Graphene Nanocomposite and its application in photovoltaic system †

Dan Xu, Wei-Lin Chen\*, Jian-Sheng Li, Xiao-Jing Sang, Ying Lu, Zhong-Min Su and En-Bo Wang \*

#### Experimental

**Chemicals and materials:**  $K_6[SiW_{11}V^{IV}O_{40}] \cdot 7H_2O$  and graphene oxide (GO) were prepared according to the literature method and characterized by IR.<sup>[a,b]</sup> All the other reagents are of analytical grade and used as received without further purification. All the aqueous solutions were prepared with double distilled water.

**Characterization Methods:** IR spectra were recorded using KBr pellets on a Bruker AXS TENSOR-27 FTIR spectrometer in the range of 4000–400  $cm^{-1}$ . Thermogravimetric analyses (TGA) were performed on a Perkin-Elmer TGA7 instrument in flowing  $N_2$  with a heating rate of 10  $^{\circ}C \cdot min^{-1}$ . X-ray powder diffraction data was collected on a Bruker AXS D8 Advance diffractometer using Cu  $K\alpha$  radiation ( $\lambda = 1.5418 \text{ \AA}$ ) in the  $2\theta$  range of 5–60° with a step size of 0.02°. Energy dispersive X-ray spectroscopy (EDS) was obtained from FEI Quanta 200F microscope operated at an accelerating voltage of 20kV. High resolution transmission electron microscope (HRTEM) images were carried out on a JEOL-2100F transmission electron microscope with an accelerating voltage of 200 kV. XPS was performed on F-doped  $SnO_2$  glass using an ESCALAB-MKII photoelectronic spectrometer with an Mg  $K\alpha$  (1253.6eV) achromatic X-ray source. Cyclic voltammograms were recorded on a CHI601D Electrochemical Workstation (Shanghai Chenhua Instrument Corp., China), using a glassy carbon electrode as the working electrode, a Pt wire as the counter electrode, and a Ag/AgCl reference electrode. A NaAc/HAc buffer solution with a pH of 5.5 was used as the supporting

electrolyte. The diffuse reflectivity spectra were collected on a UV-2600 SHIMADZU UV-vis spectrophotometer in reflectance mode, which was measured from 200 to 800 nm using barium sulfate ( $\text{BaSO}_4$ ) as a standard with 100% reflectance.

**Photoelectrochemical measurements:** All photoelectrochemical experiments were performed on a Model CS350 electrochemistry workstation (CH Instruments, Wuhan CorrTest Instrument Corporation, PRC) at room temperature equipped with a 100W Xenon lamp as the light source. A three-electrode system was employed in a quartz cell comprising of the FTO electrode coated by the  $\text{TiO}_2$  film as the working electrode,  $\text{Ag}/\text{AgCl}$  as the reference electrode and Pt wire as the counter electrode. All photocurrent transient experiments were carried out at a constant bias of 0 V. The photoelectrochemical measurements were carried out in a 0.1 M  $\text{Na}_2\text{SO}_4$  electrolyte which was exposed to air.

**Synthesis of reduced GO (RGO):** RGO was synthesized following the modified method of literature.<sup>[c]</sup> In short: As-prepared GO (4 mg) was dispersed in water (15 mL) under stirring and went on sonication for 1 h at room temperature. Then 25 mg L-ascorbic acid was added to the aqueous dispersion, and the mixture was stirring for 48 h at room temperature. The resulting material was filtered off, washed with water and ethanol and dried under vacuum at 80 °C for 12 h. The resultant material was labeled RGO.

**Synthesis of Polyoxometalate/Graphene hybrid material (POM/graphene):** As-prepared GO (4 mg) was dispersed in water (15 mL) under stirring and went on sonication for 1 h at room temperature. 10 mg  $\text{SiW}_{11}\text{V}$  was dissolved in 4 mL of water by stirring to form a dark purple solution. At room temperature, 25 mg L-ascorbic acid and 10 mg zinc powder were simultaneously added to the  $\text{SiW}_{11}\text{V}$  solution under stirring, while the solution colour changed from purple to dark blue. The resulting mixture was centrifuged at 5000 rpm for 3 min, and the heteropoly blue solution was dropped into the GO aqueous dispersion under stirring. The obtained suspension was further stirred for 24 h at room temperature. Then the mixture was filtered off, washed with water and ethanol and dried under vacuum at 80 °C for 12 h. The resultant material was labeled  $\text{SiW}_{11}\text{V}/\text{graphene-1}$ .

The synthesis processes for SiW<sub>11</sub>V/graphene-2, SiW<sub>11</sub>V/graphene-3 were similar to SiW<sub>11</sub>V/graphene-1, except that 20 mg and 40 mg SiW<sub>11</sub>V were used.

**Preparation of SiW<sub>11</sub>V/graphene-n@TiO<sub>2</sub> films:** Firstly, the SiW<sub>11</sub>V/graphene-n was re-dispersed in 10 mL of acetone and sonicated for 1 h. 0.05 g pristine Degussa P25 was slowly added to the suspension while stirring and sonicated for 5 min, getting blue precipitate. The blue precipitate was dried at room temperature, and the obtained powder was mixed with 0.55 g pure P25. Then SiW<sub>11</sub>V/graphene-n@TiO<sub>2</sub> paste was prepared according to the literature. <sup>[d]</sup>

The FTO conductive glass was ultrasonic cleaned with surfactant, isopropanol and ethanol respectively. The screen-printing technique was used to coat the SiW<sub>11</sub>V/graphene-n@TiO<sub>2</sub> paste on the FTO.<sup>[d]</sup> The electrodes were gradually heated in an electric stove in an air atmosphere, which the temperature gradient program has three levels at 325 °C (5 min), 375 °C (10min) and 400 °C (60min).

For comparison purposes a blank experiment (no RGO and SiW<sub>11</sub>V/graphene) was carried out. For this, the pure P25 electrodes were prepared.

a N. Yang, J. Zhai, D. Wang, Y. Chen and L. Jiang, *ACS Nano*, **2010**, 4, 887–894.

b C. Galli, P. Gentili, A. S. N. Pontes, J. A. F. Gamelas and D. V. Evtuguin, *New J. Chem.*, **2007**, 31, 1461–1467.

c J. L. Zhang, H. J. Yang, G. X. Shen, P. Cheng, J. Y. Zhang and S. W. Guo, *Chem. Commun.*, 2010, **46**, 1112–1114.

d S. Ito, P. Chen, P. Comte, M. K. Nazeeruddin, P. Liska, P. Péchy, M. Grätzel, *Photovolt: Res. Appl.*, **2007**, 15, 603–612.

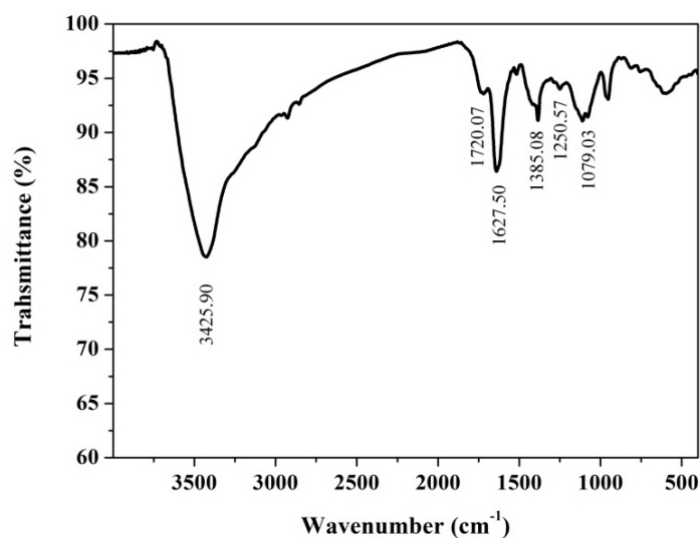

**Fig. S1** FTIR spectrum of GO. The O–H stretching at 3425.90 cm<sup>-1</sup>, the C=O stretching at 1720.07 cm<sup>-1</sup>, the O–H deformation at 1385.08 cm<sup>-1</sup>, the C–OH stretching at 1250.57 cm<sup>-1</sup> and the C–O stretching at 1079.03 cm<sup>-1</sup>, which are all oxygen-containing functional groups in GO. The peak at 1627.50 cm<sup>-1</sup> is due to the skeletal vibrations of remnant sp<sup>2</sup> species.

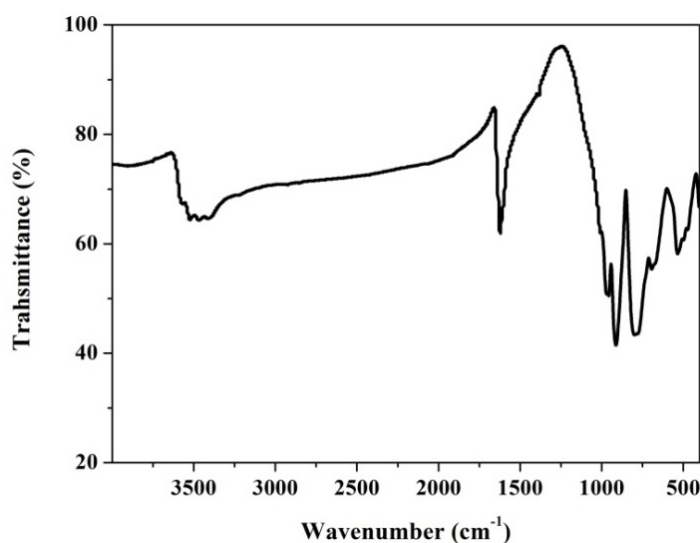

**Fig. S2** FTIR spectrum of K<sub>6</sub>[SiW<sub>11</sub>V<sup>IV</sup>O<sub>40</sub>]·7H<sub>2</sub>O.

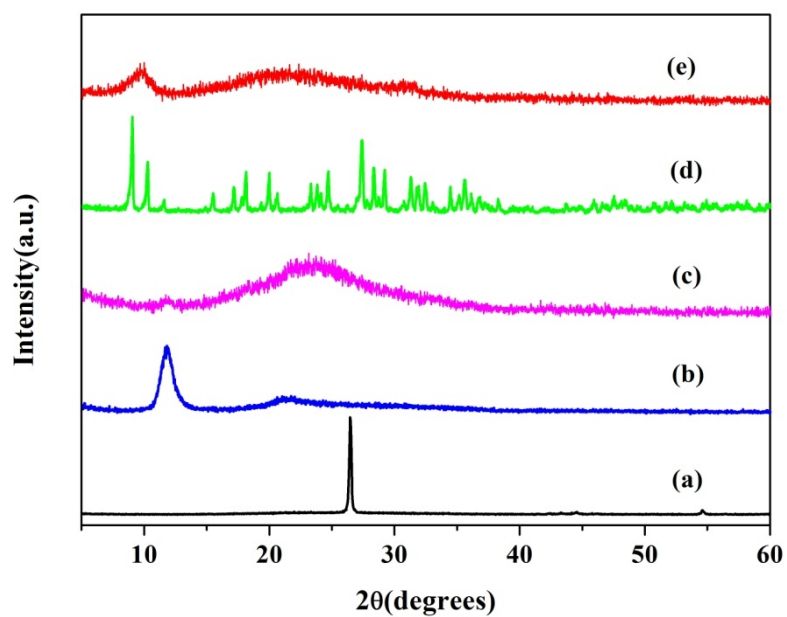

**Fig. S3** XRD patterns of raw graphite (a), GO (b), RGO (c),  $\text{SiW}_{11}\text{V}$  (d) and  $\text{SiW}_{11}\text{V}/\text{graphene-3}$  (e).

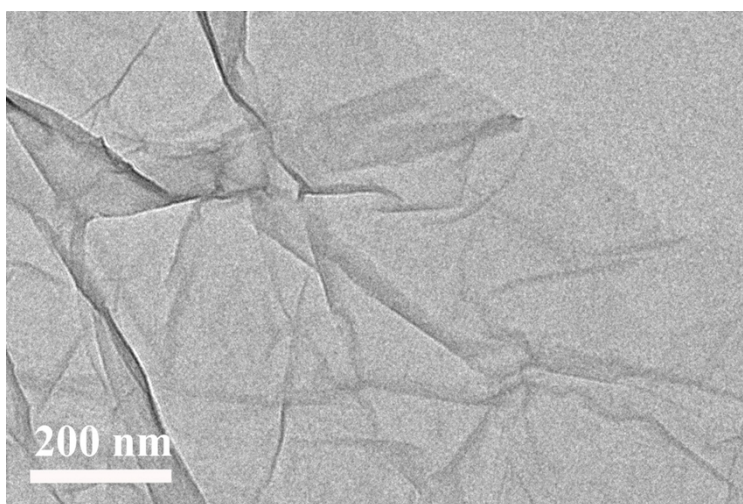

**Fig. S4** HRTEM images of RGO.

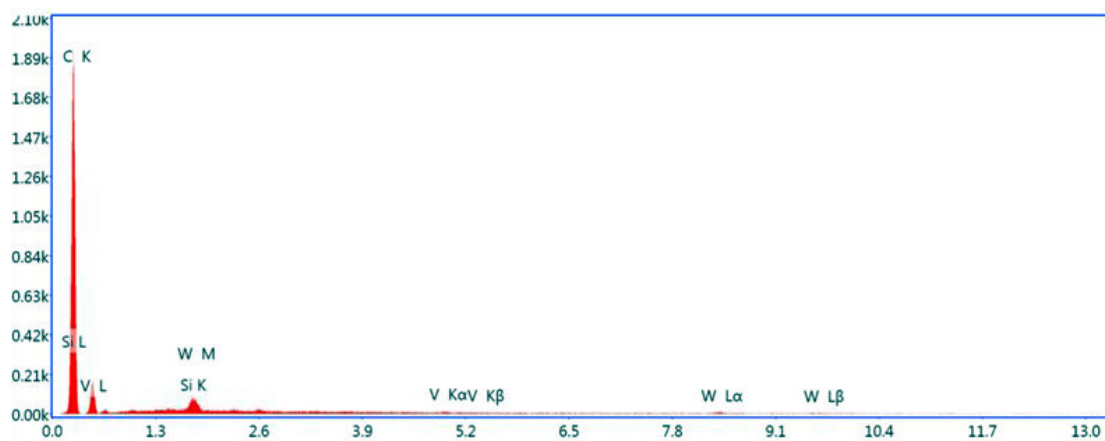

**Fig. S5** EDS of  $\text{SiW}_{11}\text{V}/\text{graphene-3}$ .

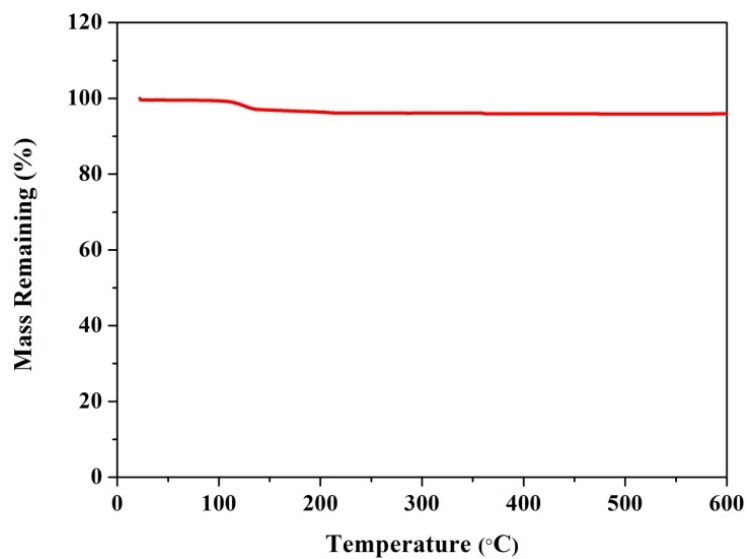

**Fig. S6** TG curve of  $K_6[SiW_{11}V^{IV}O_{40}] \cdot 7H_2O$ .

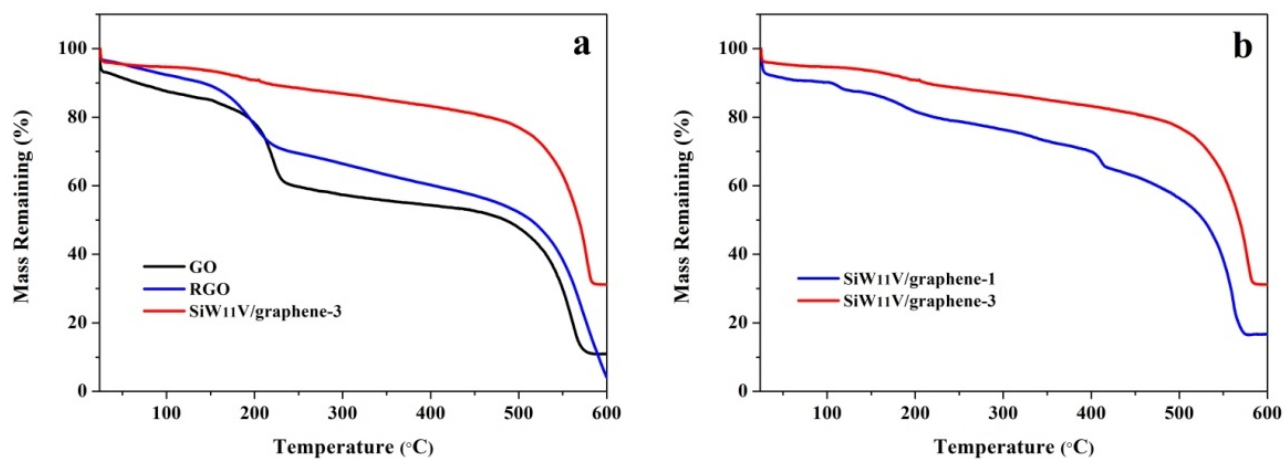

**Fig. S7** (a) TG curves of GO, RGO and  $SiW_{11}V/graphene-3$ , (b)  $SiW_{11}V/graphene-1$  and  $SiW_{11}V/graphene-3$ .

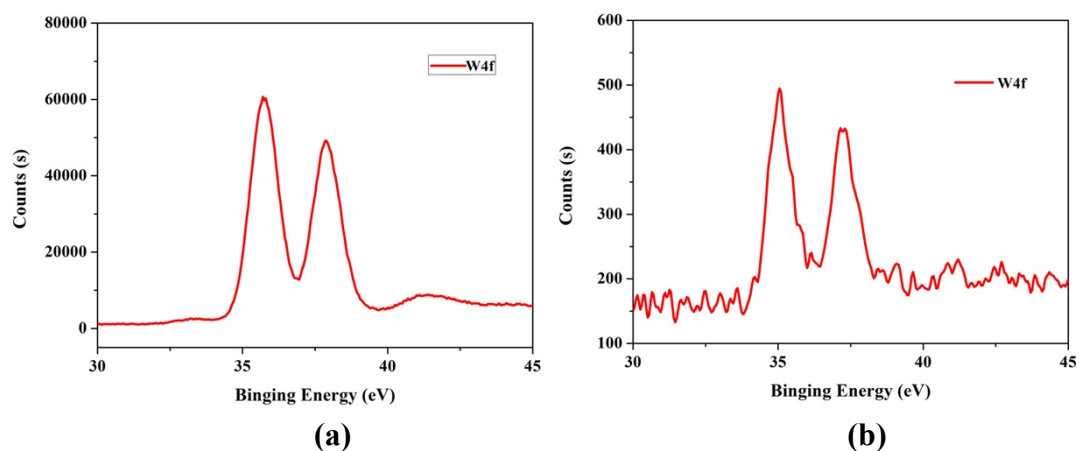

**Fig. S8** The W4f XPS spectra of  $SiW_{11}V$  (a) and  $SiW_{11}V/graphene-3$  nanocomposite (b).

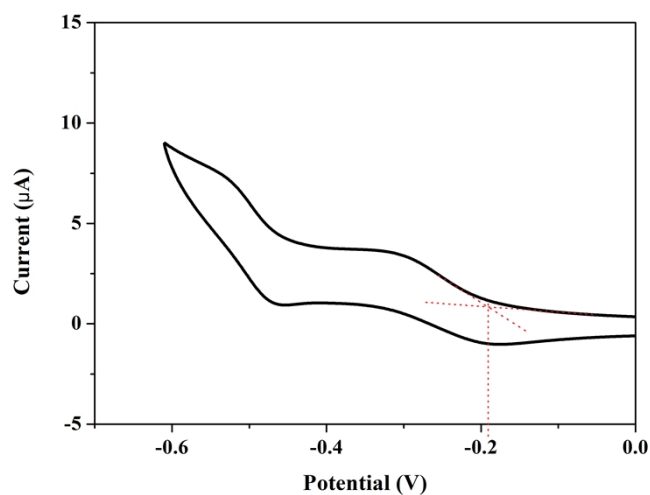

**Fig. S9** Cyclic voltammograms of  $\text{SiW}_{11}\text{V}$  in NaAc/HAc buffer with pH 5.5 for the stability of POMs in solution (vs NHE).

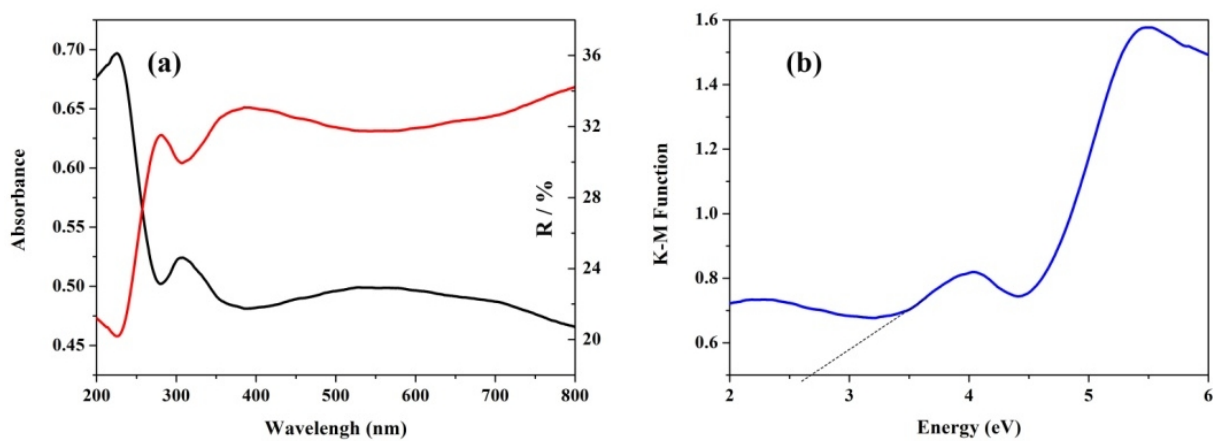

**Fig. S10** UV-Vis absorption spectrum (a dark line), the diffuse reflection spectrums (a red line) and plot of K-M function against energy  $E$  (b blue line) of  $\text{SiW}_{11}\text{V}$ .
